# Supplementary material for: Nutritional Care in Patients with Head and Neck Cancer during Chemoradiotherapy (CRT) and Bioradiotherapy (BRT) Provides Better Compliance with the Treatment Plan
Source: MDPI journal article supplement (doi:10.3390/cancers13112532), 2021-05-21
Supplement: s1 [file s1]

# Supplementary Materials: Nutritional Care in Patients with Head and Neck Cancer During Chemoradiotherapy (CRT) and Bioradiotherapy (BRT) Pro-Vides Better Compliance with the Treatment Plan

Aleksandra Kapała, Agnieszka Surwiłło-Snarska, Magdalena Jodkiewicz and Andrzej Kawecki

**Table S1.** The interaction effects for age, primary surgical treatment, initial weight loss, PEG.

| Interaction Effects                       | Weight Loss                                   | Used Percentage of the Planned Dose of Drugs (%) |
|-------------------------------------------|-----------------------------------------------|--------------------------------------------------|
| Age                                       | $F(1214) = 2,22; p = 0,138; \eta^2p = 0,010$  | $F(1204) = 13,11; p < 0,001; \eta^2p = 0,060$    |
| Group                                     | $F(1214) = 0,51; p = 0,474; \eta^2p = 0,002$  | $F(1204) = 5,69; p = 0,018; \eta^2p = 0,027$     |
| Age $\times$ Group                        | $F(1214) = 4,08; p = 0,045; \eta^2p = 0,019$  | $F(1204) = 0,06; p = 0,806; \eta^2p < 0,001$     |
| Primary surgical treatment                | $F(1215) = 3,88; p = 0,050; \eta^2p = 0,018$  | $F(1205) = 8,32; p = 0,004; \eta^2p = 0,039$     |
| Group                                     | $F(1215) = 9,02; p = 0,003; \eta^2p = 0,040$  | $F(1205) = 25,26; p < 0,001; \eta^2p = 0,110$    |
| Primary surgical treatment $\times$ Group | $F(1215) = 2,88; p = 0,091; \eta^2p = 0,013$  | $F(1205) = 1,99; p = 0,160; \eta^2p = 0,010$     |
| Initial weight loss                       | $F(1215) = 9,92; p = 0,002; \eta^2p = 0,044$  | $F(1204) = 0,23; p = 0,634; \eta^2p = 0,001$     |
| Group                                     | $F(1215) = 3,76; p = 0,056; \eta^2p = 0,017$  | $F(1204) = 8,36; p = 0,004; \eta^2p = 0,039$     |
| Initial weight loss $\times$ Group        | $F(1215) = 0,20; p = 0,654; \eta^2p = 0,001$  | $F(1204) = 0,01; p = 0,919; \eta^2p < 0,001$     |
| PEG                                       | $F(1215) = 5,62; p = 0,019; \eta^2p = 0,070$  | $F(1205) < 0,01; p = 0,995; \eta^2p < 0,001$     |
| Group                                     | $F(1215) = 16,23; p < 0,001; \eta^2p = 0,636$ | $F(1205) = 16,07; p < 0,001; \eta^2p = 0,073$    |
| PEG $\times$ Group                        | $F(1215) = 0,67; p = 0,414; \eta^2p = 0,025$  | $F(1205) = 0,47; p = 0,494; \eta^2p = 0,002$     |
